# Supplementary material
Source: PubMed Central journal article supplement (PMC8091850)
Supplement: JCM.02890-20-s0001.pdf [file JCM.02890-20-s0001.pdf]

## **Supplemental Material and Methods**

### **Control samples**

The specificity control samples comprised serum samples from 130 hospitalized patients with pneumonia, of whom 46 were treated at an ICU (59 female, 71 male, median age: 61 years, range: 1-93). These samples had been collected between July 2019 and February 2020 and were sent to the Centre for Virology for serological routine screening testing by complement binding fixation (CBF). PCR from corresponding respiratory specimens and/or serology confirmed infection with Influenza A (INA) and B (INB) viruses (n=7), Rhinoviruses (n=3), Respiratory Syncytial virus (n=3; RSV), Adenovirus (n=1; ADV), Herpes simplex virus type 1 (n=2), Human Cytomegalovirus (n=2), *Mycoplasma pneumoniae* (n=2, MCP) or *Legionella pneumophila* (n=1). In all other cases, serum samples tested negative for INA, INB, RSV, ADV, MCP, parainfluenza, and enteroviruses using CBF. Serum samples collected between January and February 2020 (n=13) were only included when there was a corresponding respiratory sample, and this sample tested negative for SARS-CoV-2 by PCR. After routine testing, these samples were anonymized and integrated into a sample bank for future comparative immunoassay studies. Since these anonymized samples had been acquired in the past, the local ethics committee concluded that no written consent from control individuals was required for this study (EK 2156/2019).

### **PCR**

For PCR analyses, nucleic acid was extracted from the nasopharyngeal swab and tracheal aspirate samples using the NucliSens EasyMag extractor, according to the manufacturer's instructions (Biomerieux, Marcy l'Etoile, France). SARS-CoV-2 real-time TaqMan PCR was performed with primers and probe recommended by the WHO and located in the E-gene, as

described previously [1]. Sensitive detection was confirmed using a proficiency panel from Instand (Instand, Düsseldorf, Germany).

### **Serum dilution**

The automated ELISA system for the assessment of S1-specific IgA antibodies (Euroimmun SARS-CoV-2 IgA ELISA on an Euroimmun Analyzer I; both Lübeck, Germany) indicates when the measured optical density (OD) exceeds the linear limit of the standard curve at a dilution of 1:101 (the dilution factor the manufacturer recommends), and in this case does not report results as antibody ratios for respective samples. In order to correlate IgA antibody levels with disease severity nevertheless, we then further diluted the samples from 1:5120 to 1: 20.480 and remeasured the samples until the measured OD decreased linearly with dilution and then recalculated the antibody Ratio accordingly.

### **Reference:**

1. Corman VM, Landt O, Kaiser M, et al. Detection of 2019 novel coronavirus (2019-nCoV) by real-time RT-PCR. *Euro Surveill* **2020**; 25.

# Supplemental Figure S1: S1, S2 and NCP-specific IgM, IgA, and IgG antibody levels in controls

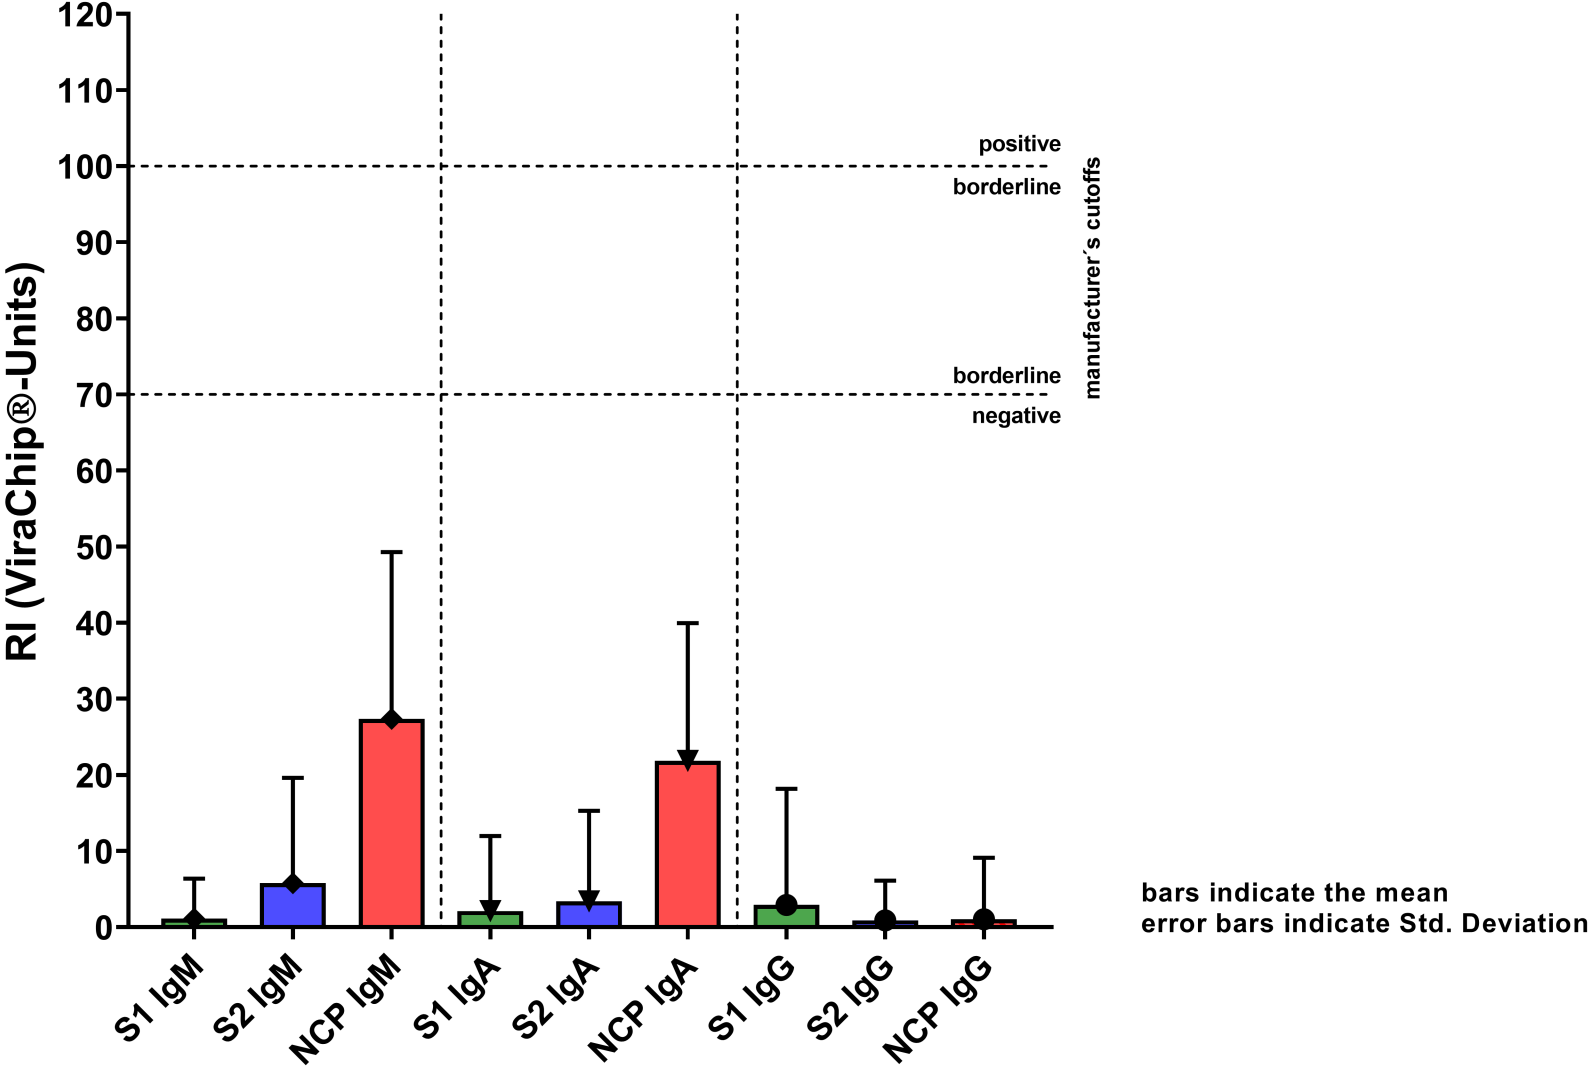

|                                     | IgM  |       |       | IgA  |       |       | IgG   |      |      |
|-------------------------------------|------|-------|-------|------|-------|-------|-------|------|------|
|                                     | S1   | S2    | NCP   | S1   | S2    | NCP   | S1    | S2   | NCP  |
| mean (RI, ViraChip®-Units)          | 1.13 | 5.77  | 27.36 | 2.12 | 3.39  | 21.83 | 2.90  | 0.89 | 1.02 |
| Std. Deviation                      | 5.24 | 13.83 | 21.31 | 8.92 | 11.89 | 18.12 | 15.28 | 5.21 | 8.10 |
| cut-off level (RI, ViraChip®-Units) | 20   | 40    | 70    | 20   | 30    | 60    | 40    | 20   | 20   |

**Supplemental Table S1: Overview of the SARS-CoV-2 immunoassays (ELISAs/CLIAs) used in the study**

| Test                                                | Manufacturer                                   | Principle                  | Instrument                 | Target Antigen            | Immunglobulin class         | Unit            | cutoff                         |            |          |
|-----------------------------------------------------|------------------------------------------------|----------------------------|----------------------------|---------------------------|-----------------------------|-----------------|--------------------------------|------------|----------|
|                                                     |                                                |                            |                            |                           |                             |                 | negative                       | borderline | positive |
| <b>SARS-CoV-2 IgM, IgA, and IgG ViraChip® assay</b> | Viramed, Planegg, Germany                      | Microarray                 | ViraChip® Scanner          | S1, S2, NCP, respectively | IgM, IgA, IgG, respectively | ViraChip®-Units | shown in Supplemental Figure 1 |            |          |
| <b>SARS-CoV-2 IgA ELISA</b>                         | Euroimmun, Lübeck, Germany                     | ELISA                      | Euroimmun Analyzer I       | S1                        | IgA                         | Ratio           | <0.8                           | 0.8-1.1    | >1.1     |
| <b>SARS-CoV-2 IgG ELISA</b>                         |                                                |                            |                            |                           | IgG                         |                 |                                |            |          |
| <b>NCP-SARS-CoV-2 IgM ELISA</b>                     |                                                |                            |                            | NCP                       | IgM                         |                 |                                |            |          |
| <b>NCP-SARS-CoV-2 IgG ELISA</b>                     |                                                |                            |                            |                           | IgG                         |                 |                                |            |          |
| <b>Wantai SARS-CoV-2 IgM ELISA</b>                  | Wantai Biological Pharmacy Ent, Beijing, China | Bio-Tek Instruments ELx808 | RBD of S1                  | IgM                       | <0.9                        | 0.9-1.1         | >1.1                           |            |          |
| <b>Wantai SARS-CoV-2 Ab ELISA</b>                   |                                                |                            |                            | total Ig                  |                             |                 |                                |            |          |
| <b>LIAISON® SARS-CoV-2 IgG CLIA</b>                 | Diasorin, Saluggia, Italy                      | CLIA                       | Diasorin XL Liasion        | S1, S2                    | IgG                         | AU/ml           | <12                            | 12-15      | >15      |
| <b>Platelia SARS-CoV-2 Total Ab Assay</b>           | Bio-Rad Laboratories, Inc., Hercules, USA      | ELISA                      | Bio-Tek Instruments ELx808 | NCP                       | total Ig                    | Index R         | <0.8                           | 0.8-1      | >1       |
| <b>Elecsys Anti-SARS-CoV-2 ECLIA</b>                | Roche, Basel, Switzerland                      | ECLIA                      | Cobas e411                 | NCP                       | total Ig                    | COI             | <1                             |            | ≥1       |
| <b>COVID-19 ELISA IgM+IgA</b>                       | Vircell, Valencia, Spain                       | ELISA                      | Bio-Tek Instruments ELx808 | S, NCP                    | IgM, IgA                    | Index           | <6                             | 6-8        | >8       |
| <b>COVID-19 ELISA IgG</b>                           |                                                |                            |                            |                           | IgG                         |                 | <4                             | 4-6        | >6       |

# Supplemental Figure S2: SARS-CoV-2 RNA concentration

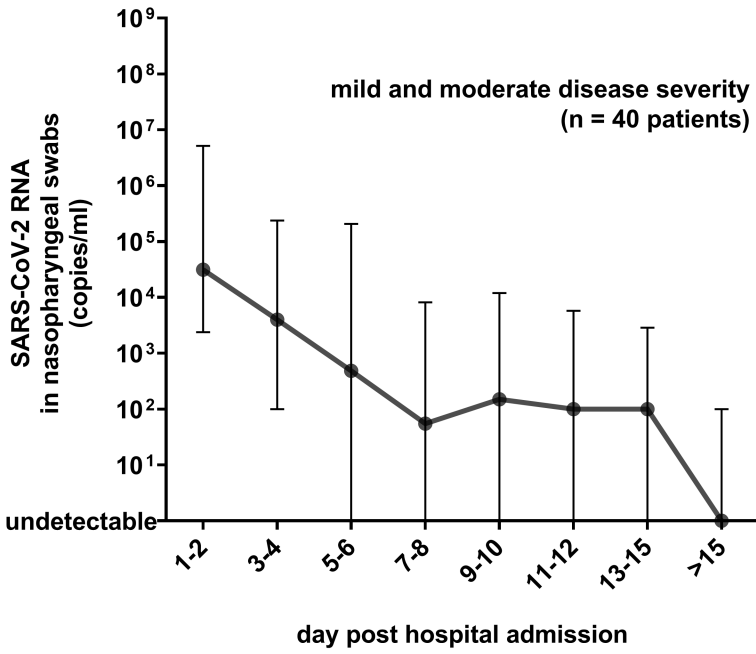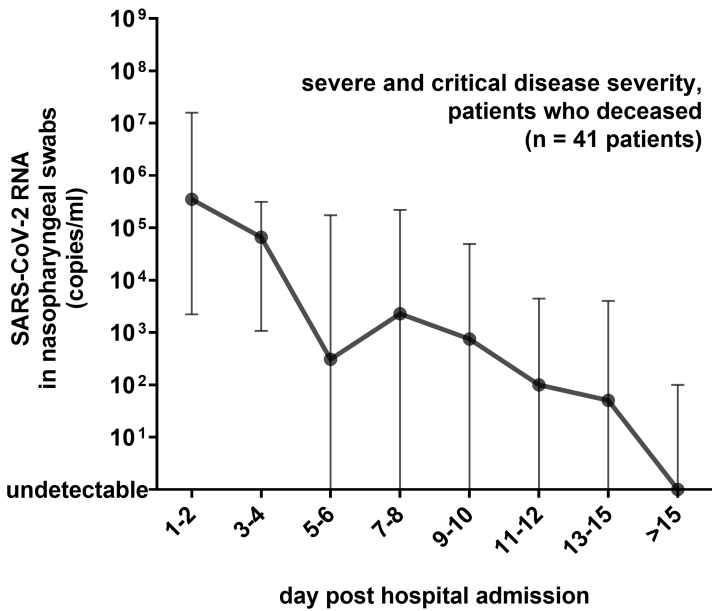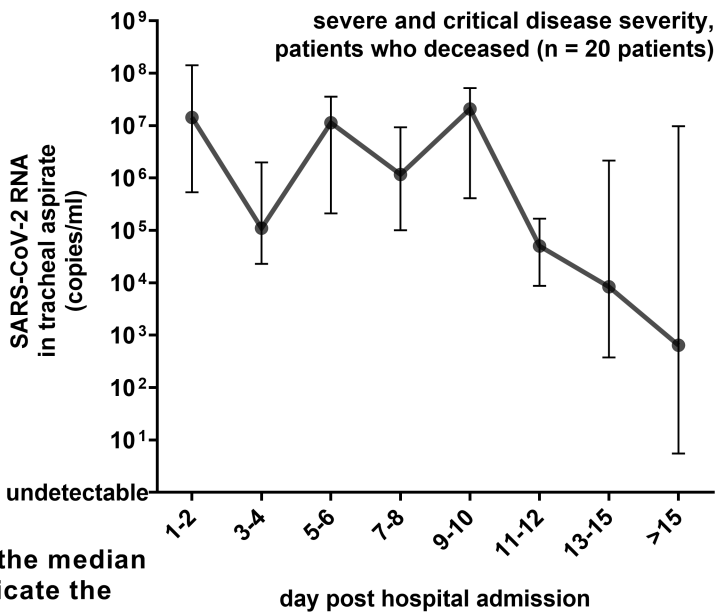

lines indicate the median  
error bars indicate the  
interquartile range

**Supplemental Table S2: sample number per interval (using one sample per patient per interval-step)**

| days post onset of symptoms | 1-2 | 3-4 | 5-6 | 7-8 | 9-10 | 11-12 | 13-14 | 15-16 | 17-18 | 19-20 | 21-22 | 23-24 | 25-26 |
|-----------------------------|-----|-----|-----|-----|------|-------|-------|-------|-------|-------|-------|-------|-------|
| number of samples (n)       | 11  | 18  | 23  | 31  | 42   | 38    | 43    | 37    | 29    | 28    | 23    | 16    | 15    |

# Supplemental Figure S3: antibody levels in controls

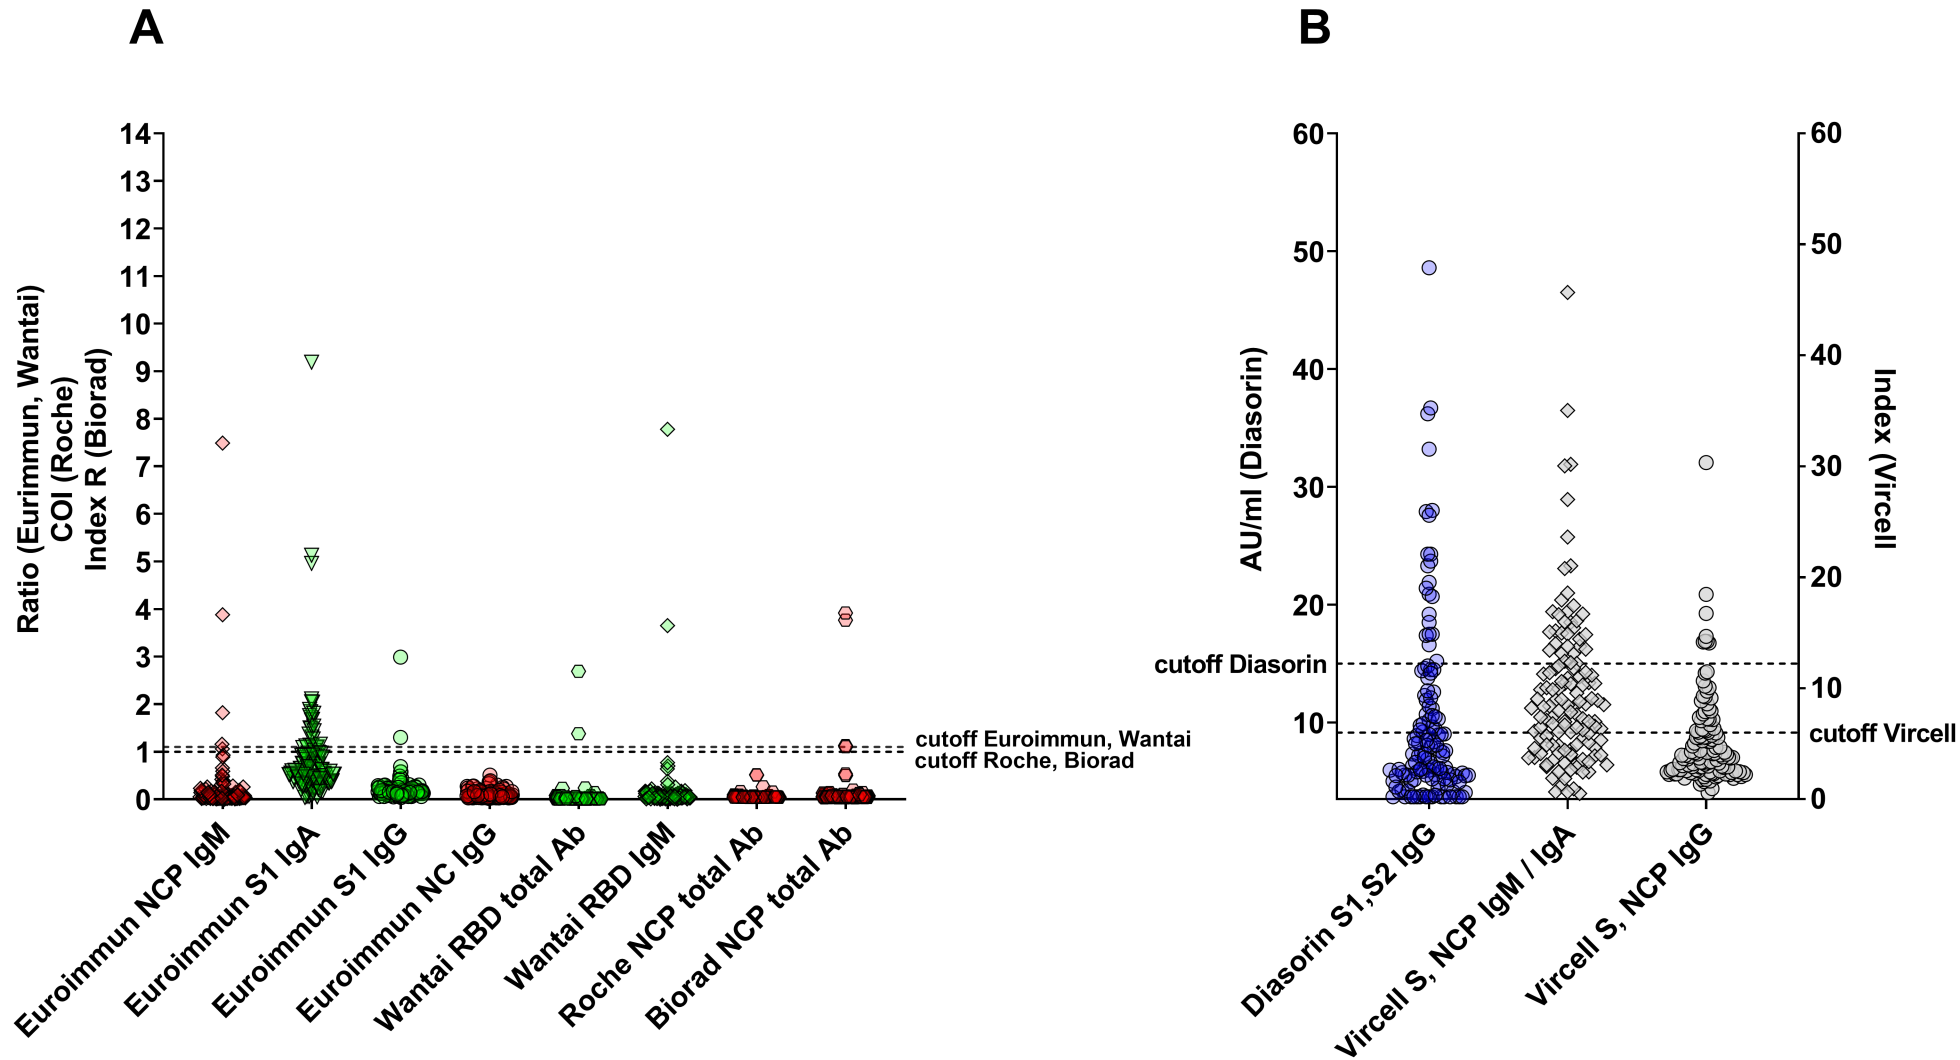

# Supplemental Figure S4: Antibody levels (Microarray)

bars indicate the mean, error bars indicate the standard deviation

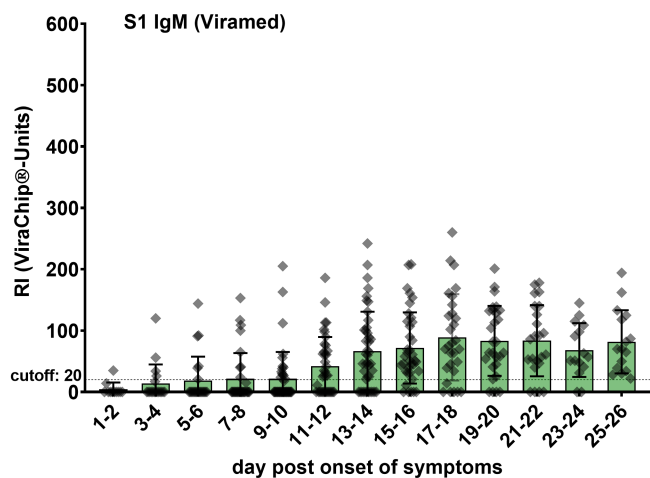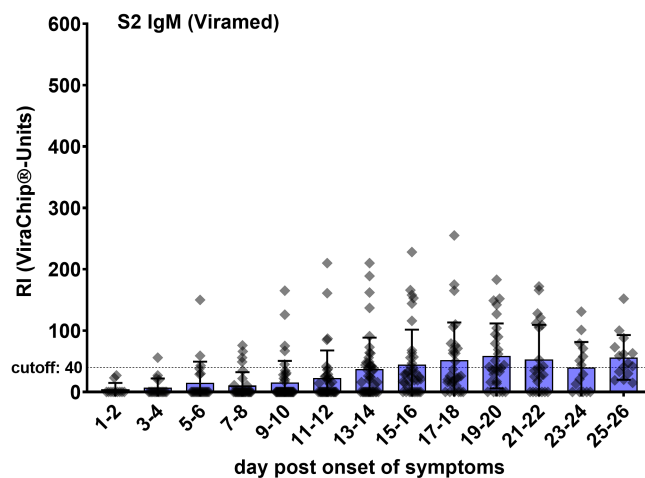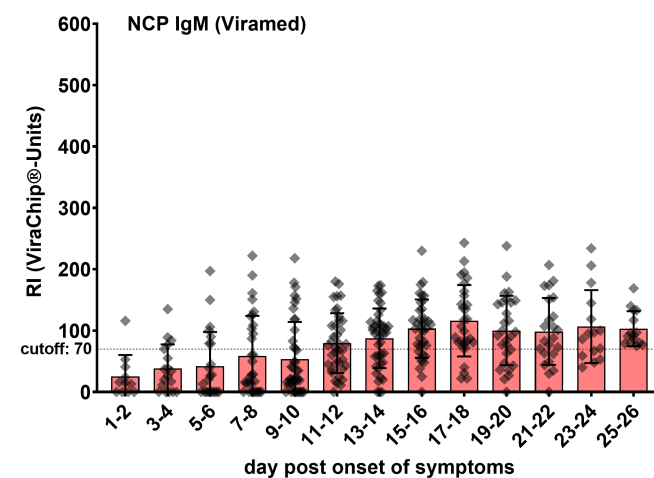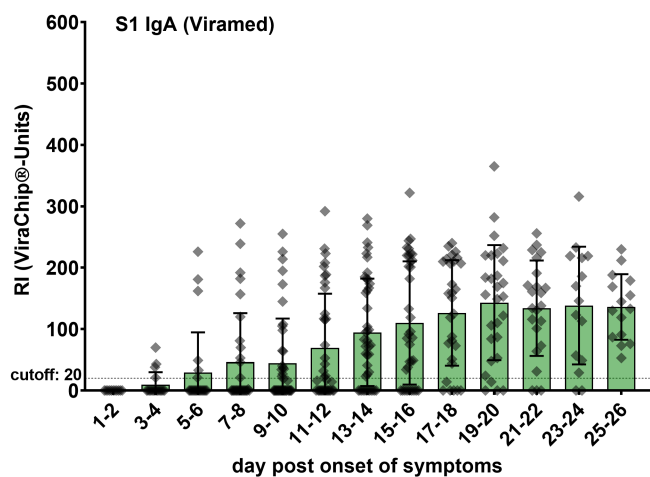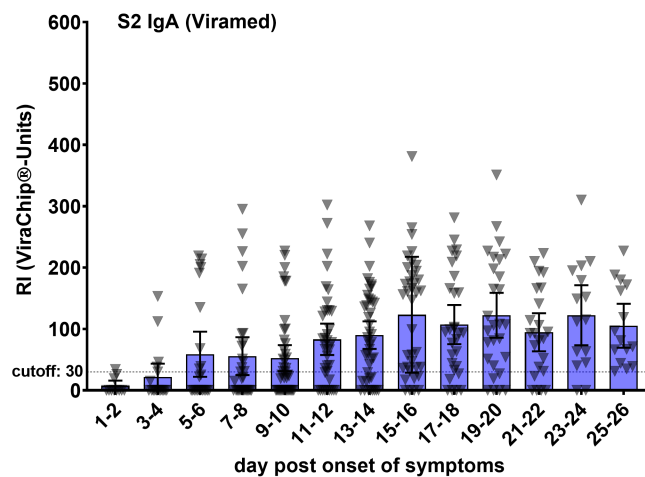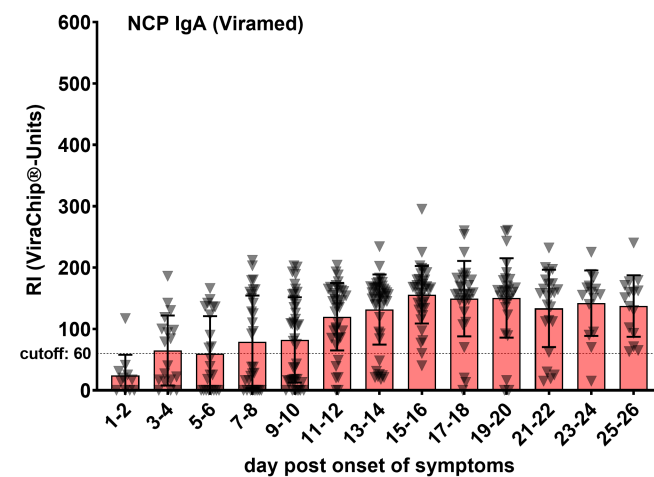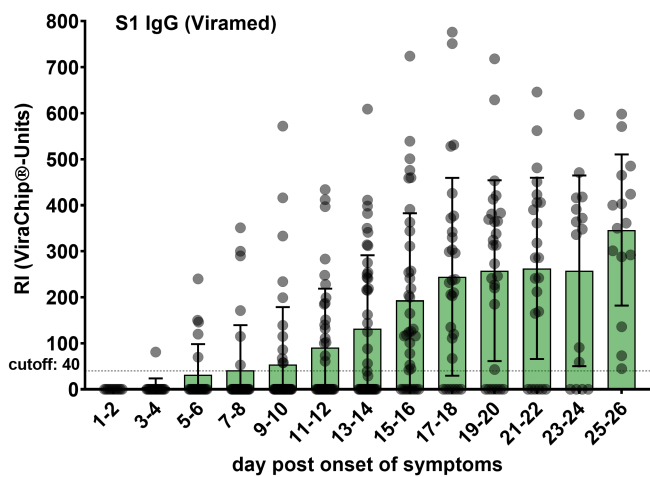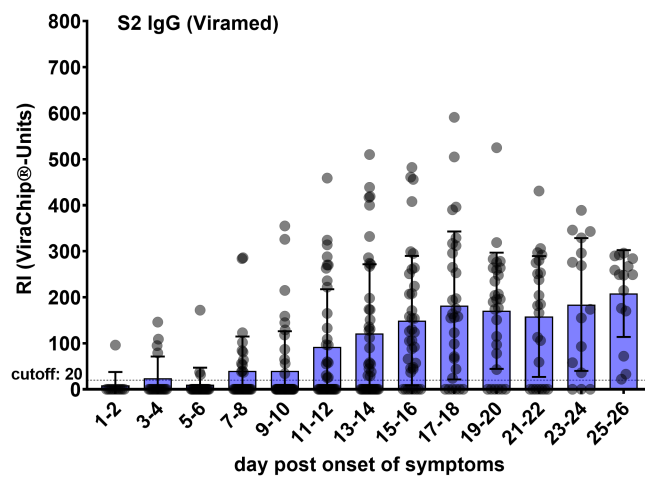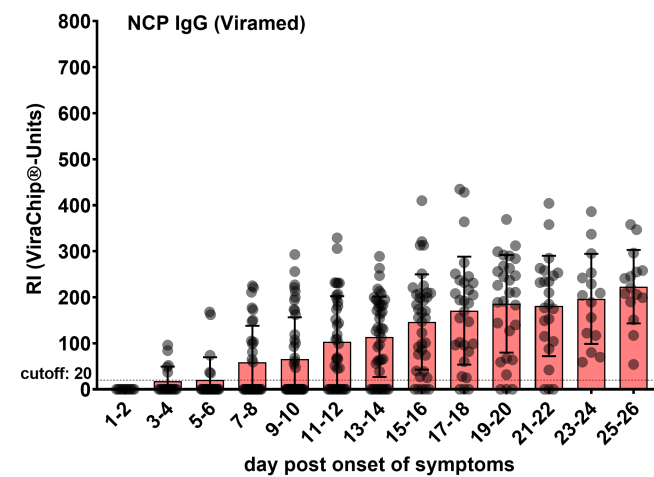



# Supplemental Figure S5: Antibody levels (ELISAs and CLIAs)

bars indicate the mean, error bars indicate the standard deviation

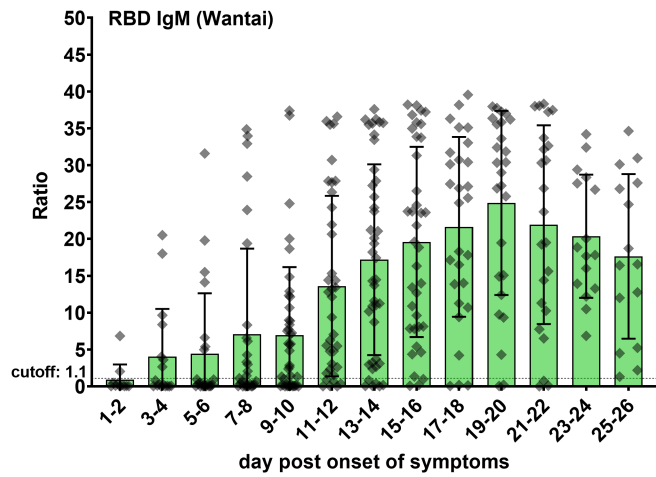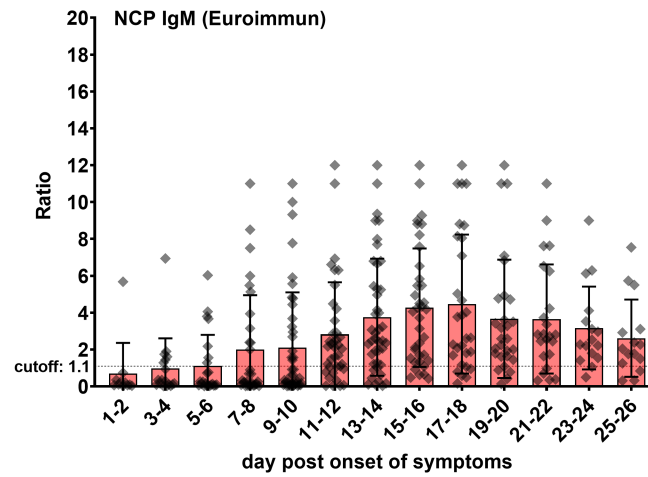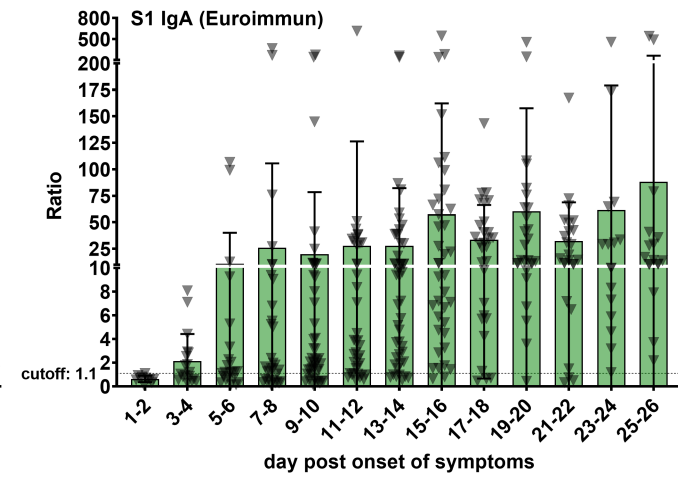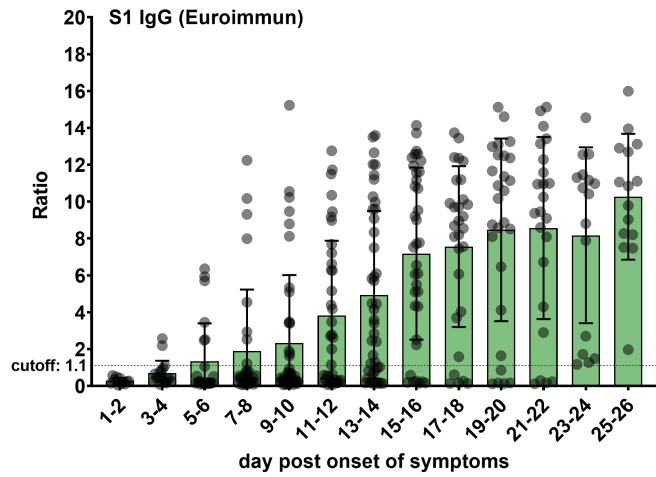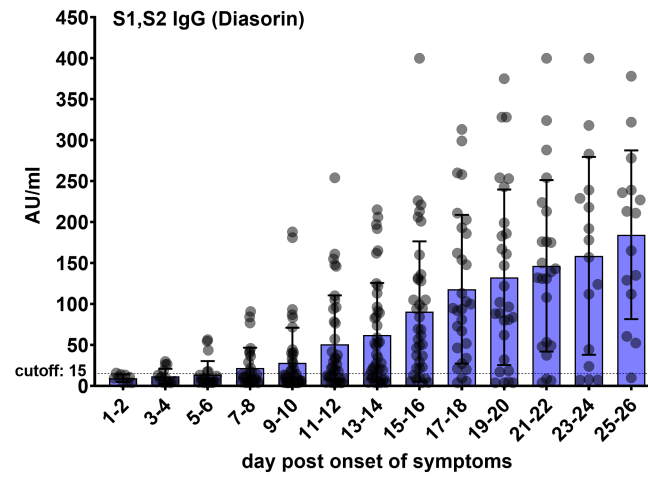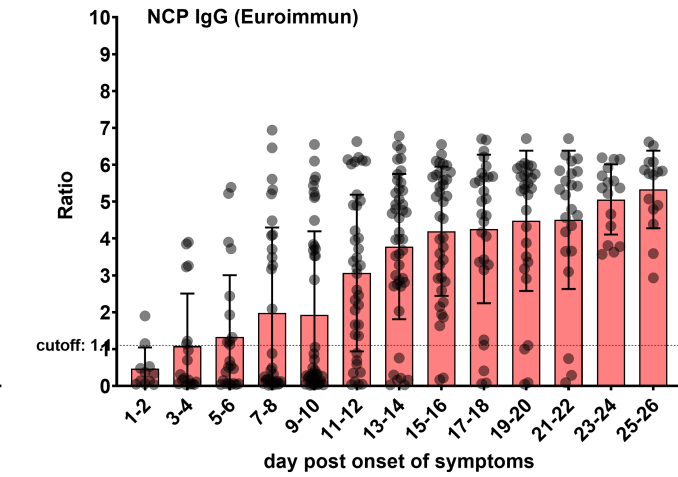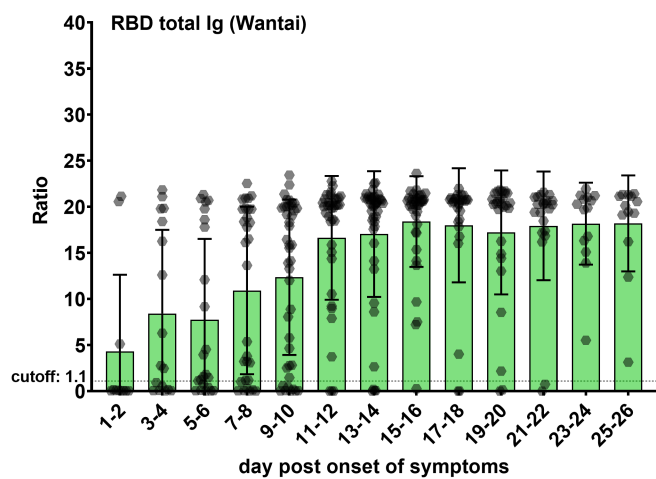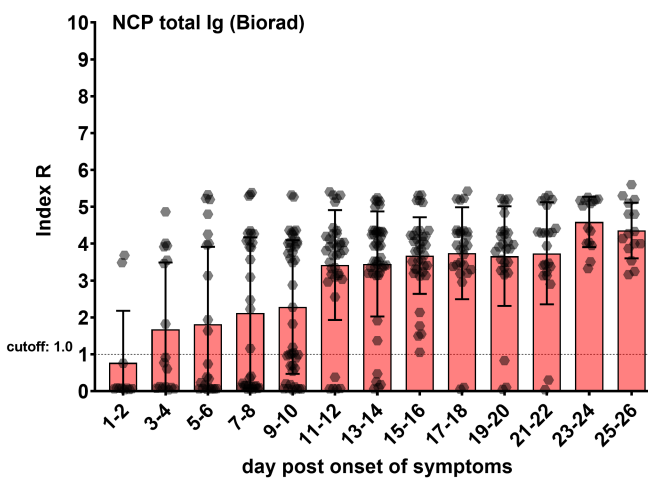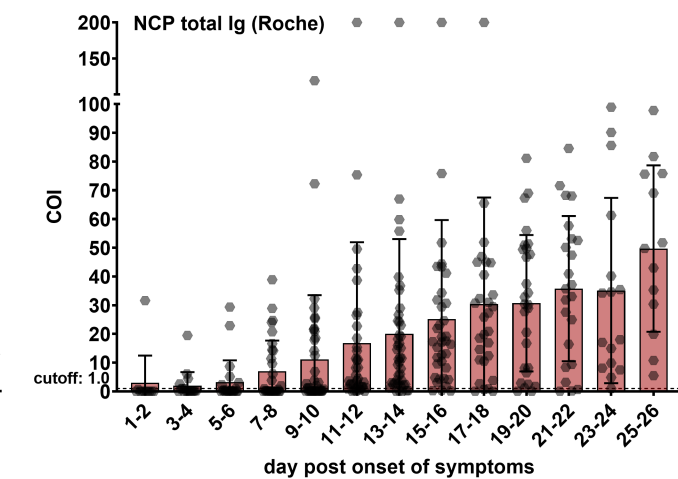

# Supplemental Figure S6: detection rates and antibody levels of immunoassays with low specificity

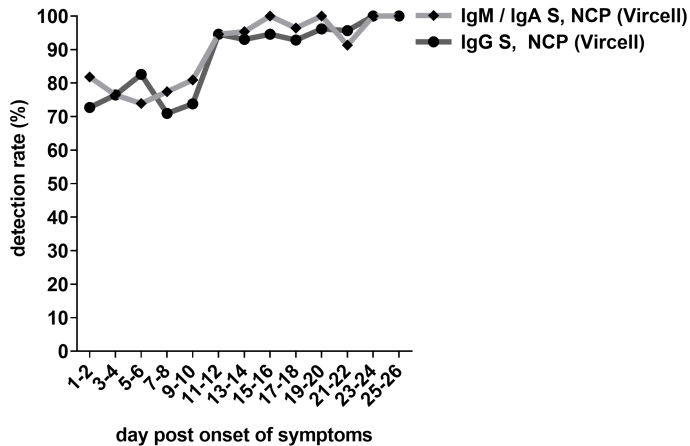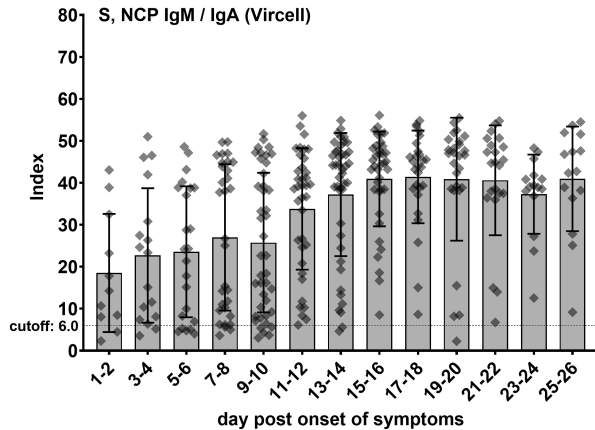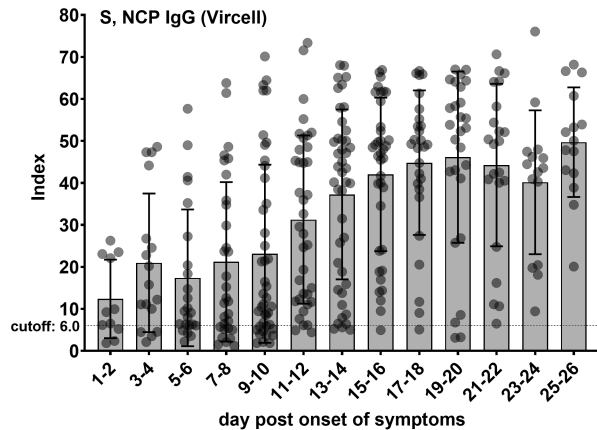

bars indicate the mean, error bars indicate the standard deviation

# Supplemental Figure S7: correlation of the results by the microarray and the NT

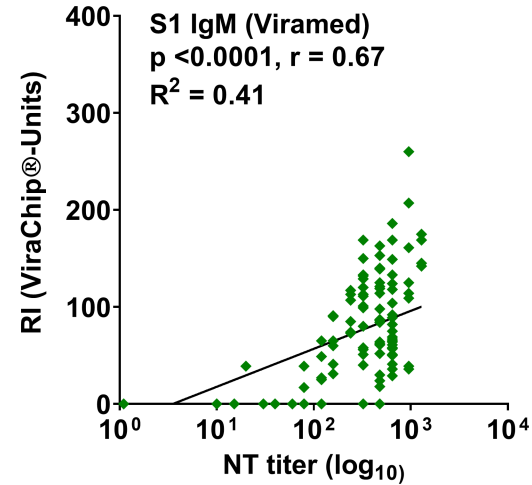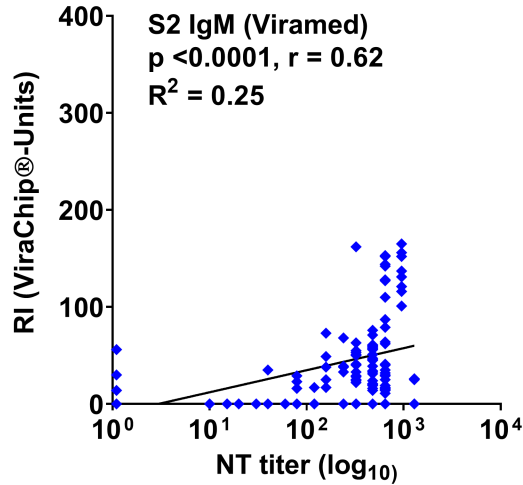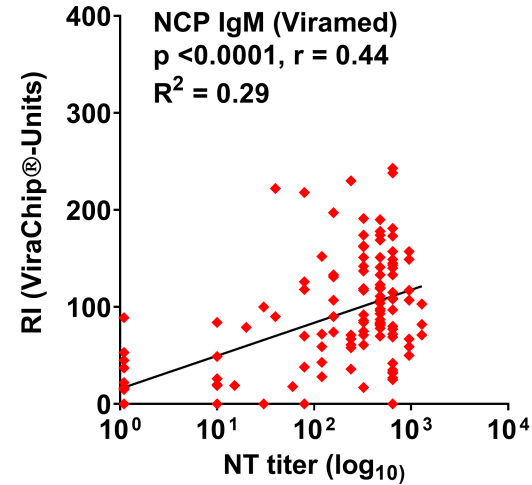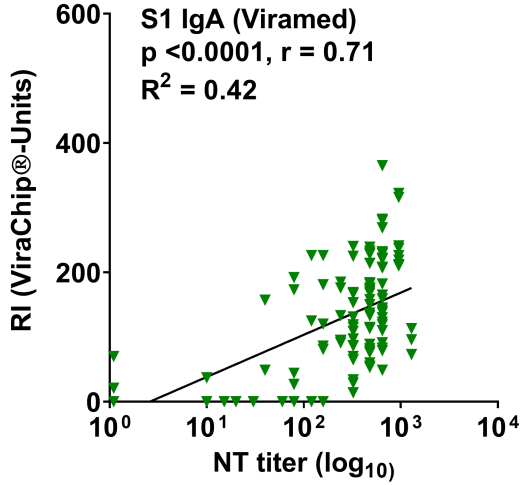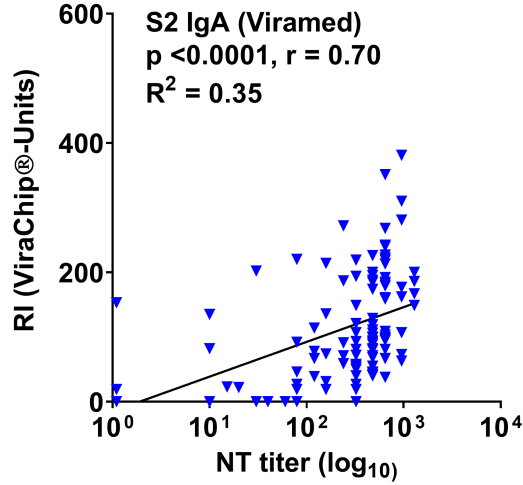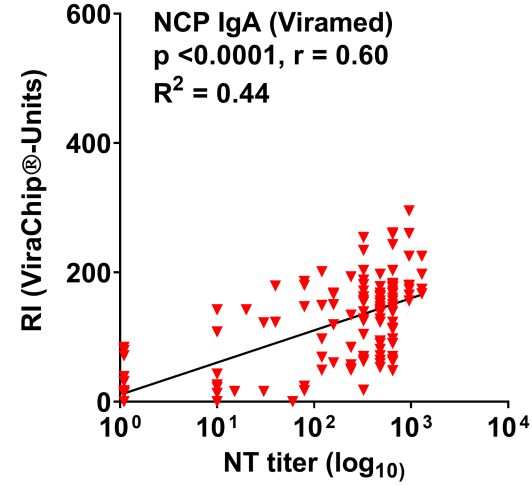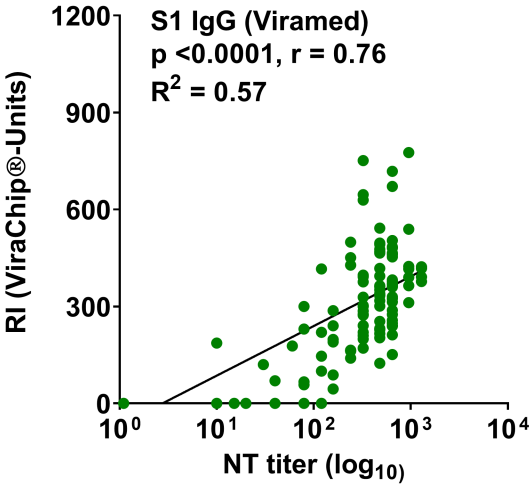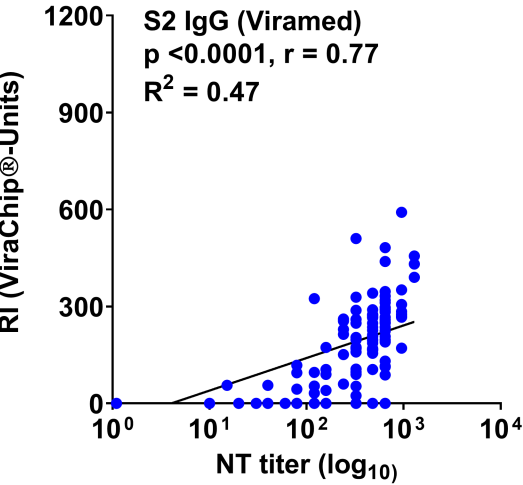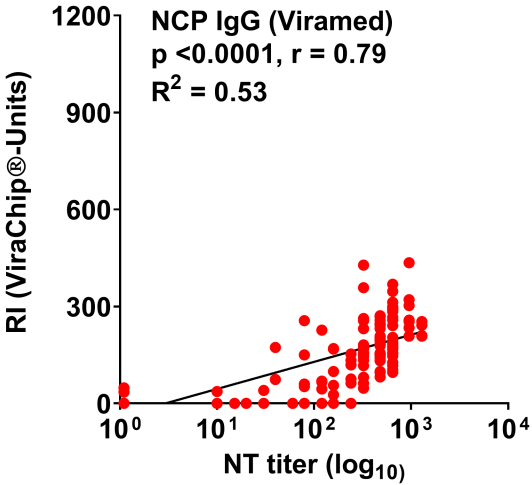

# Supplemental Figure S8: correlation of the results by the ELISAs/CLIAs and the NT

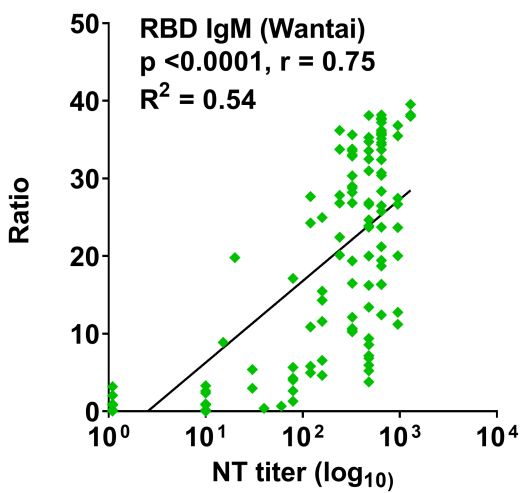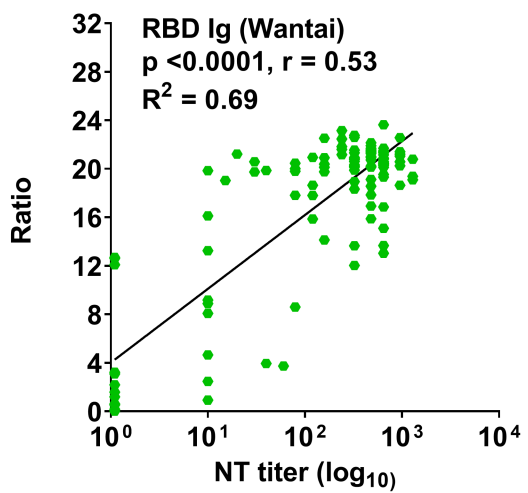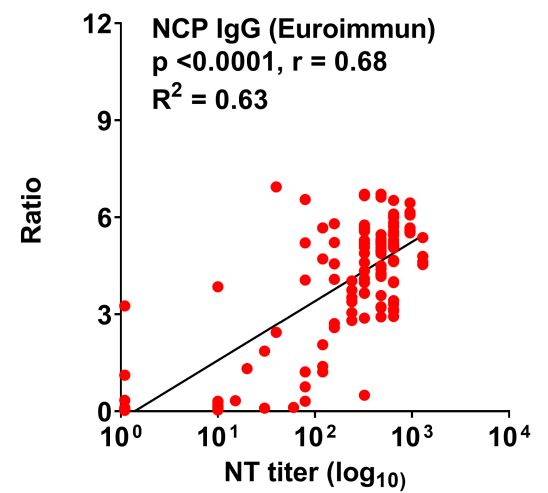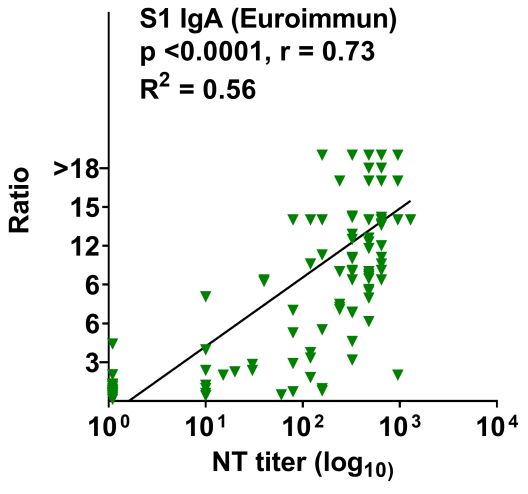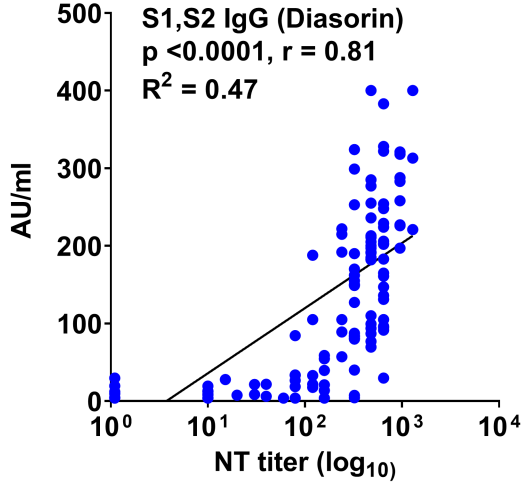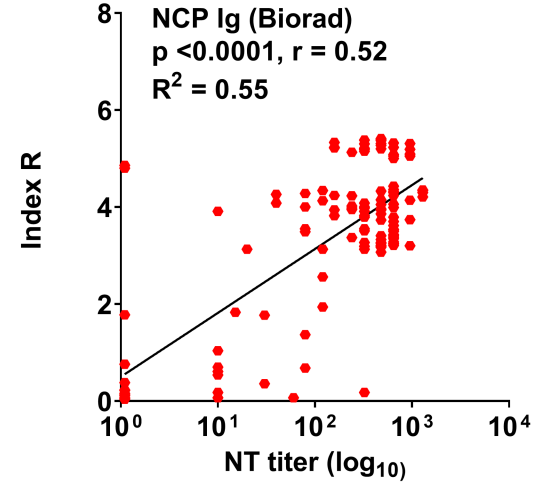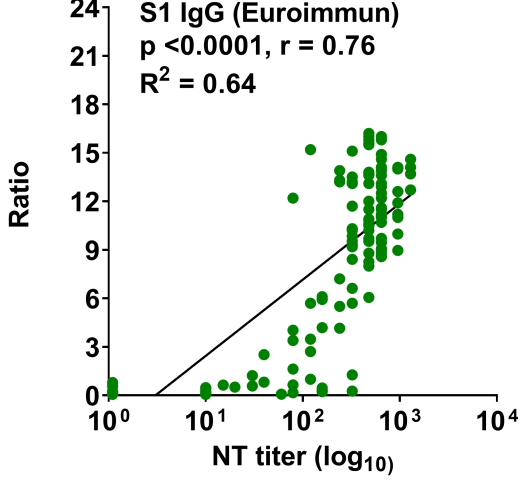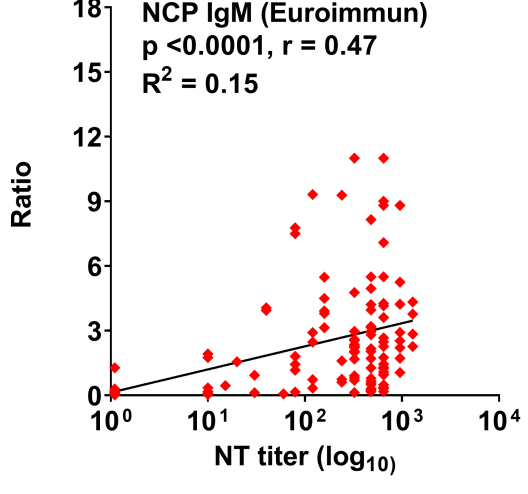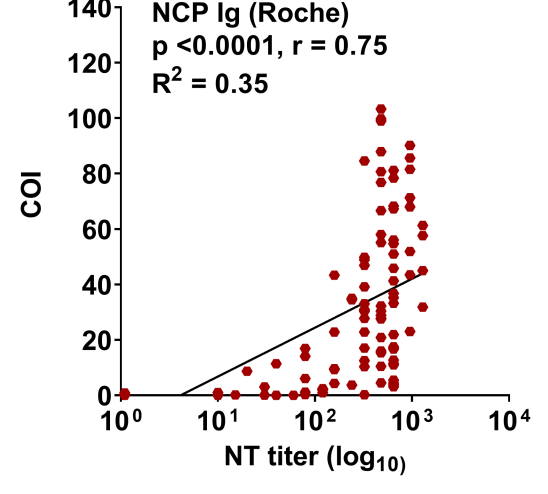

**Supplemental Figure S9:**  
**Antibody levels in relation to disease severity as assessed with the other immunoassays (not shown in Figure 7)**

**NCP**

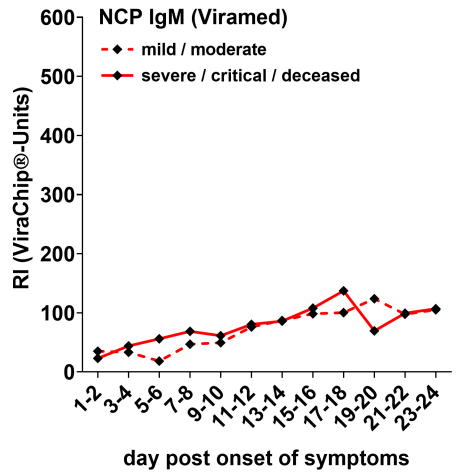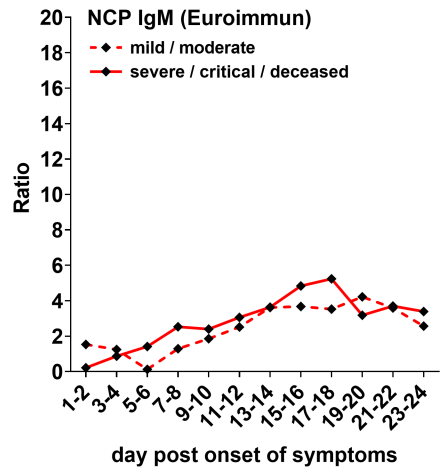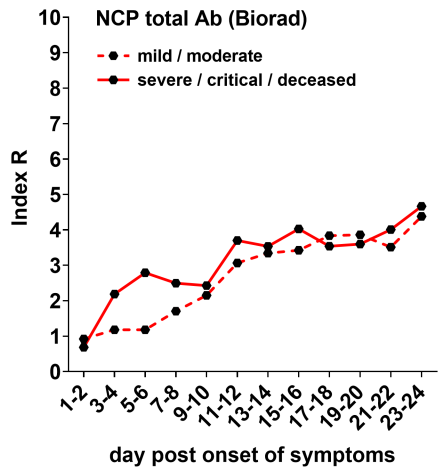

**S2**

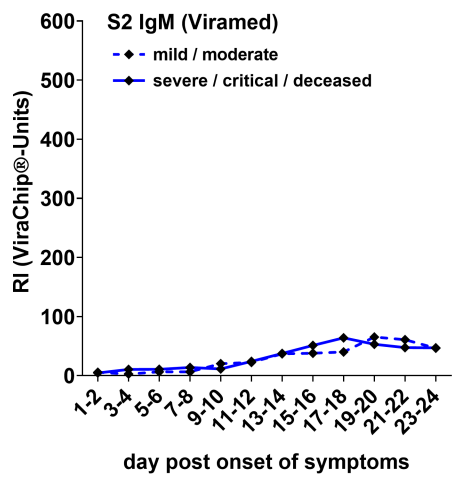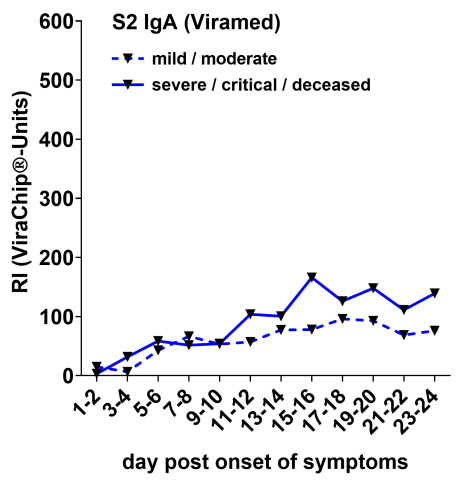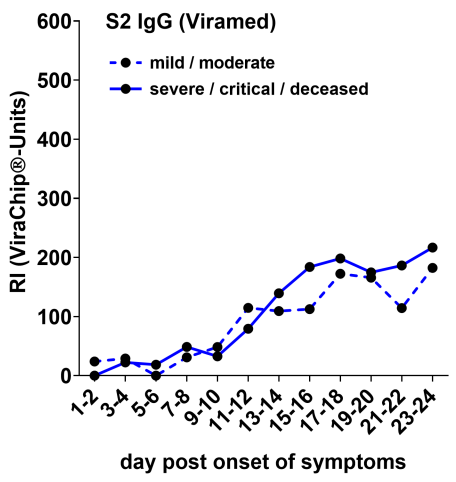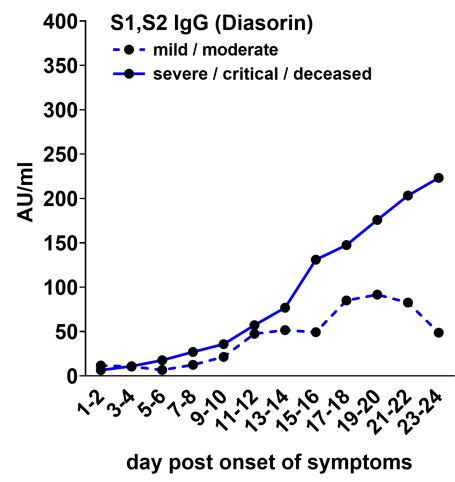

**S1-IgM  
 RBD**

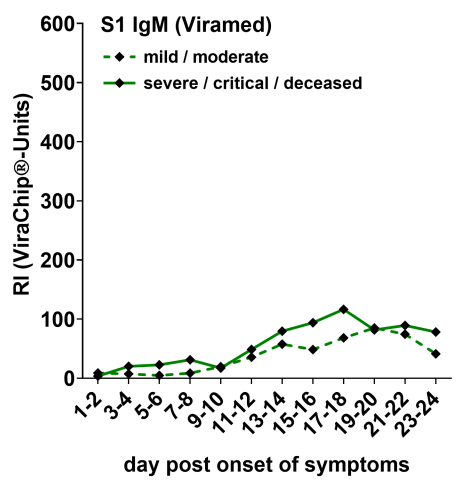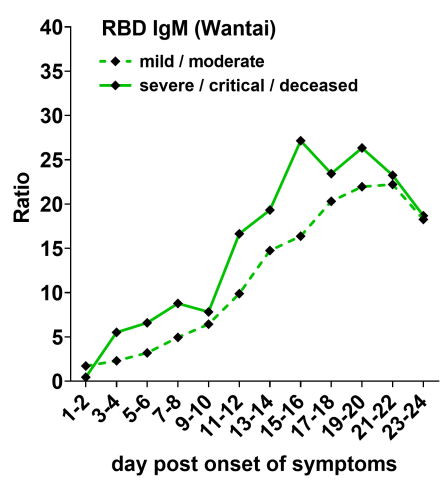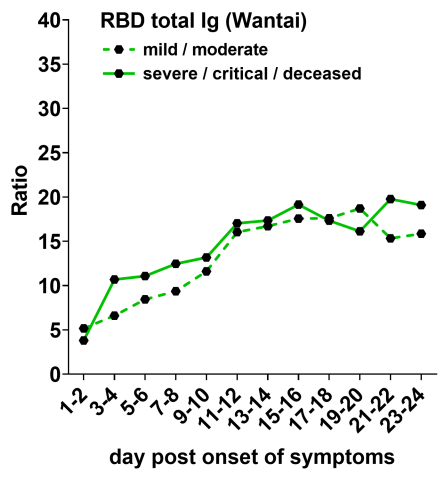

lines indicate median antibody levels
